# Supplementary material for: Genome-wide analysis identifies a role for common copy number variants in specific language impairment
Source: PubMed Central journal article supplement (PMC4592089; doi:10.1038/ejhg.2014.296), 2015-01-14
Supplement: ejhg2014296x1.pdf [file ejhg2014296x1.pdf]

Supplementary Figure S1 - Correlation between phenotypic traits and CNV measures in family cohort (513 individuals).

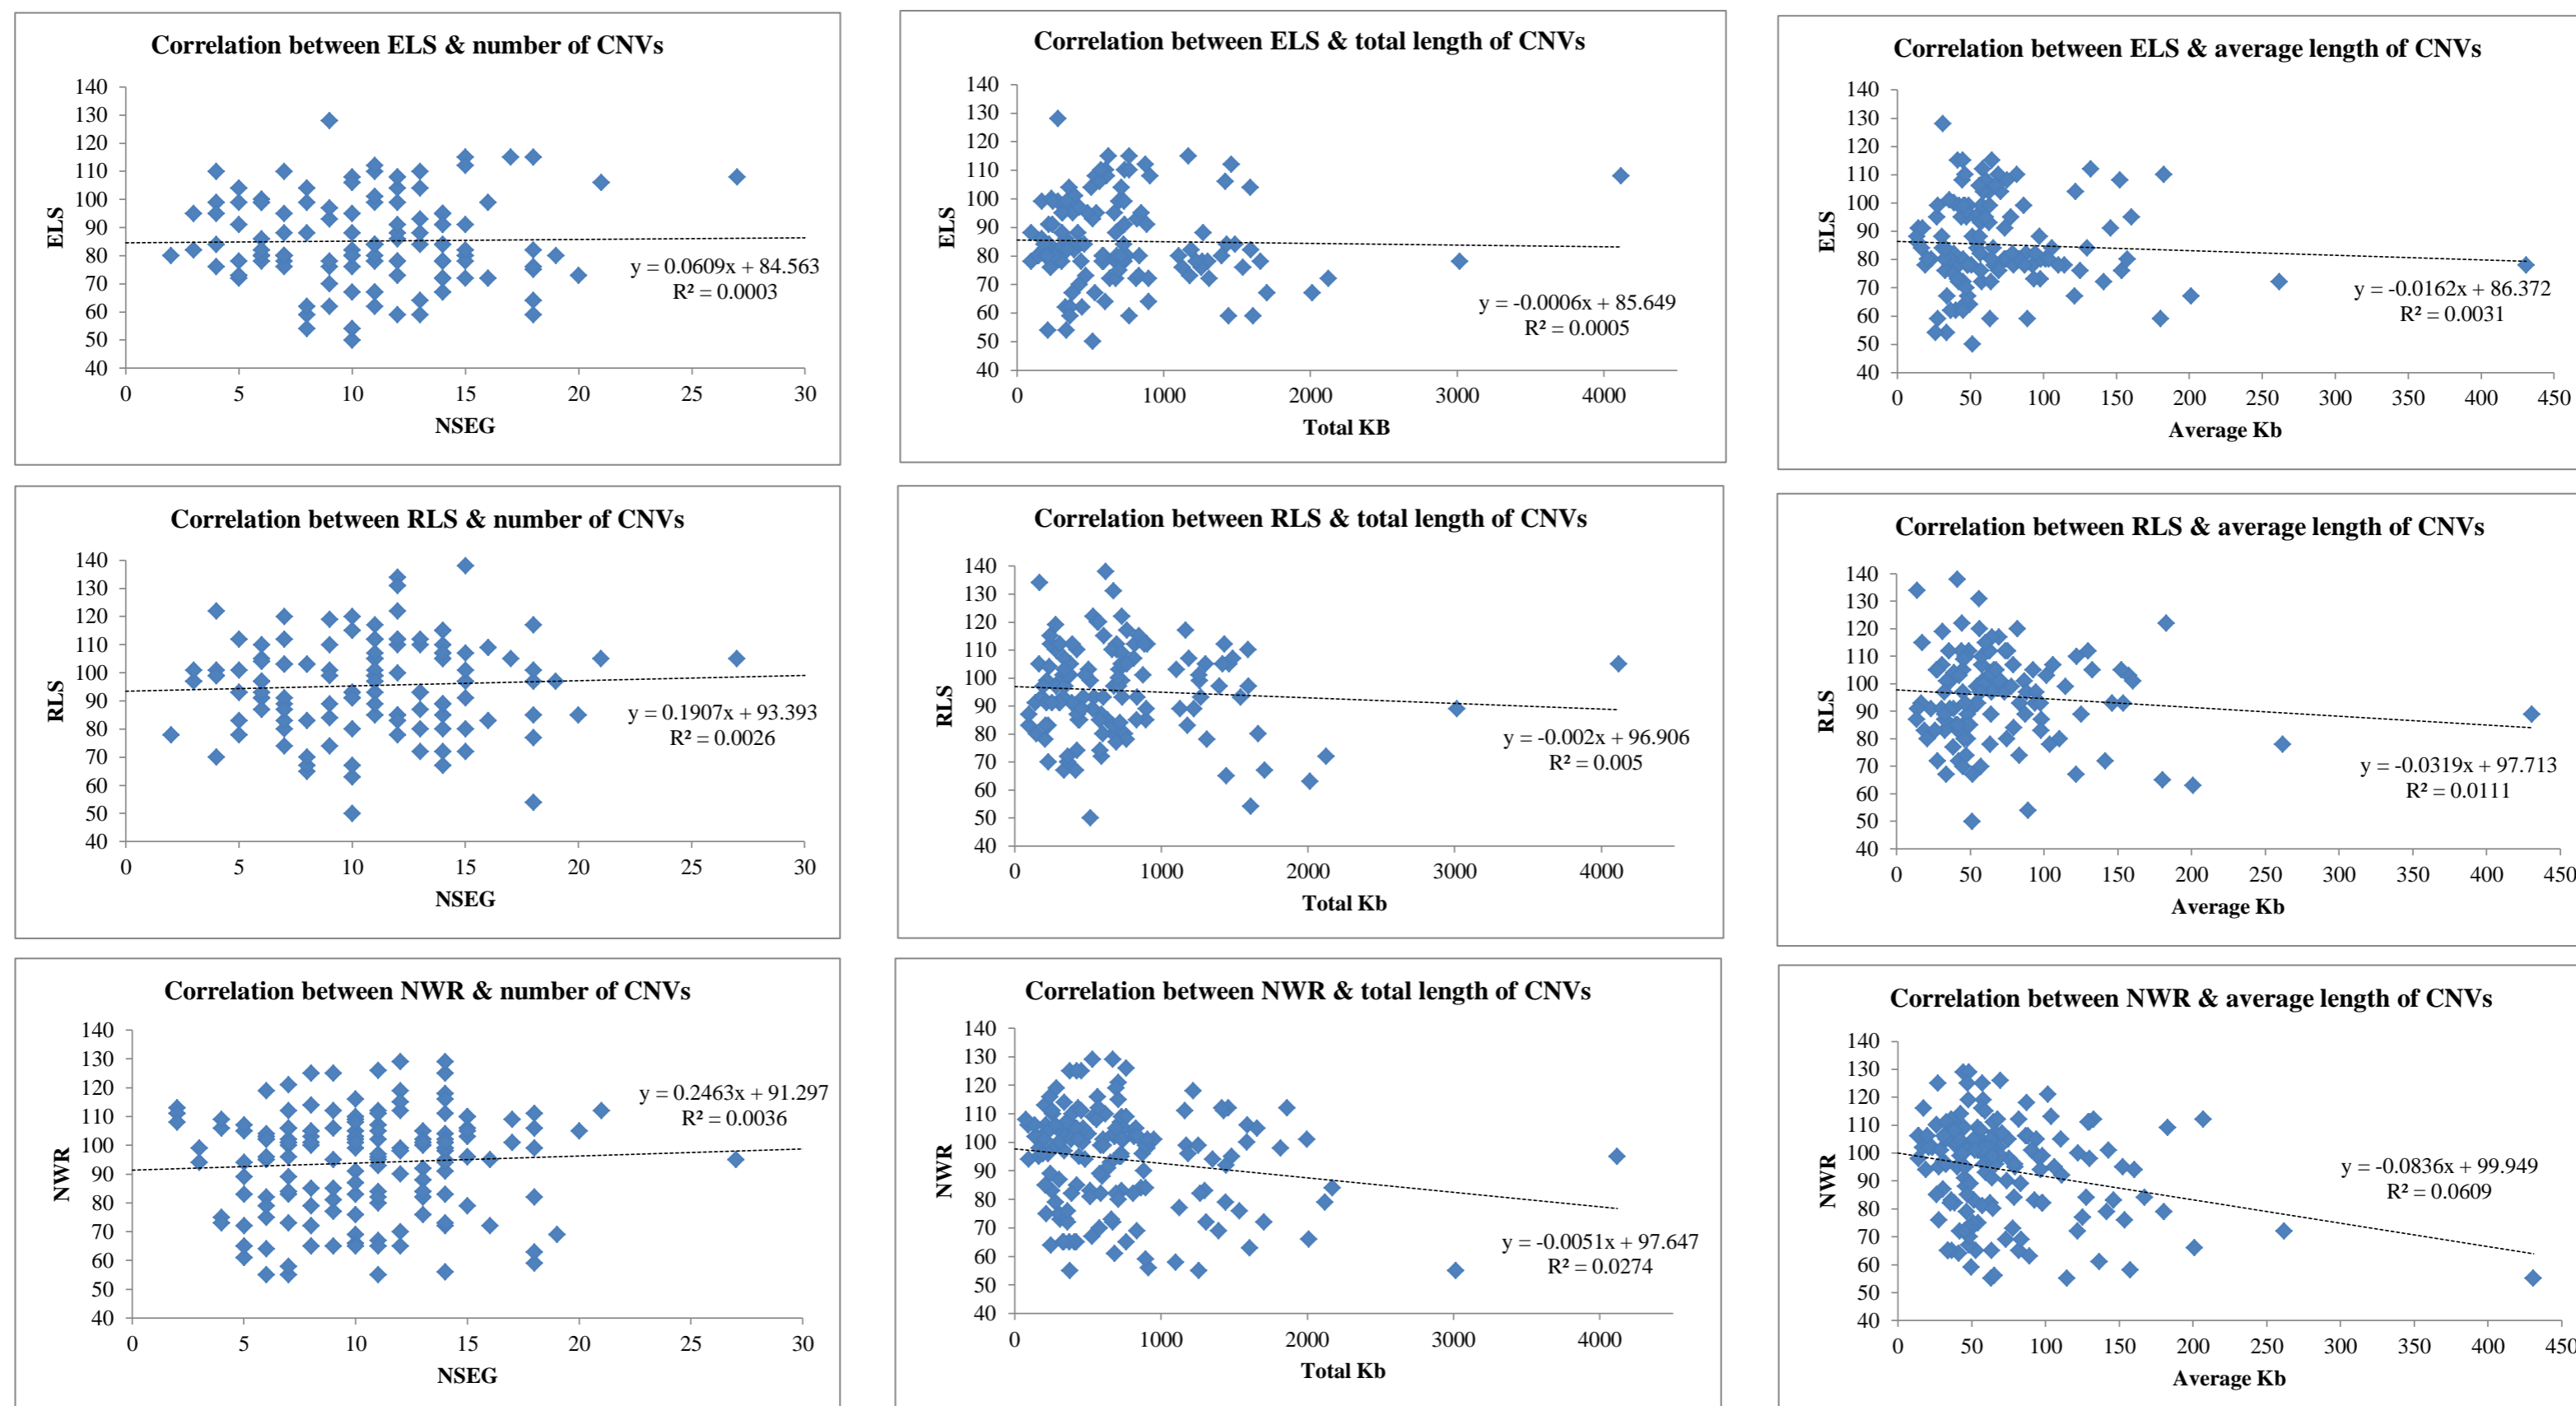

ELS - CELF Expressive Language Score  
 RLS - CELF Receptive Language Score  
 NWR - Nonword repetition
