# Supplementary material for: Genome-wide analysis identifies a role for common copy number variants in specific language impairment
Source: PubMed Central journal article supplement (PMC4592089; doi:10.1038/ejhg.2014.296), 2015-01-14
Supplement: ejhg2014296x2.pdf [file ejhg2014296x2.pdf]

**Supplementary Table. Copy number changes in regions reported to be of importance in neurodevelopmental disorders and their frequencies in independent cases and population controls.**

|                      | Genomic coordinates (hg19)  | No. CNVs in independent SLI cases |           |              | No. CNVs in controls |           |              | Freq independent cases with CNVs % | Freq controls with CNVs % |
|----------------------|-----------------------------|-----------------------------------|-----------|--------------|----------------------|-----------|--------------|------------------------------------|---------------------------|
|                      |                             | Total                             | Deletions | Duplications | Total                | Deletions | Duplications |                                    |                           |
| 7q11.23              | chr7:72,023,729 -75,368,283 | 0                                 | 0         | 0            | 0                    | 0         | 0            | 0                                  |                           |
| chr15q11-13          | chr15:19,000,001-33,600,000 | 20                                | 11        | 9            | 37                   | 23        | 14           | 15.7%                              |                           |
| chr15q11.2 (BP1-BP2) | chr15:22,758,000-23,229,000 | 2                                 | 1         | 1            | 6                    | 2         | 4            | 1.6%                               |                           |
| 16p13.1              | chr16:14,752,499-18,792,499 | 0                                 | 0         | 0            | 0                    | 0         | 0            | 0                                  |                           |
| 16p11.2              | chr16:28,832,499-30,192,499 | 0                                 | 0         | 0            | 0                    | 0         | 0            | 0                                  |                           |
| 22q11.2              | chr22:18,640,000-25,080,000 | 4                                 | 1         | 3            | 9                    | 1         | 8            | 3.1%                               |                           |
